# Supplementary material
Source: PubMed Central journal article supplement (PMC7589523)
Supplement: NIHMS1630161-supplement-Supplemental_figure_legend.pdf [file NIHMS1630161-supplement-Supplemental_figure_legend.pdf]

SUPPLEMENTAL FIGURE LEGEND

**Supplementary Figure 1: Ad-FIR suppresses both cyclinE and P27 expression in HeLa cells**

HeLa cells were transfected with Ad-FIR or Ad-FIR $\Delta$ exon2, and after 48 h of incubation, the whole-cell proteins were extracted and the expression of protein was determined by Western blotting. Mock; no treatment, Ad-GFP; control, Ad-FIR and Ad-FIR $\Delta$ exon2 treatment at 2.5 MOI.
