# Supplementary material
Source: PubMed Central journal article supplement (PMC7589523)

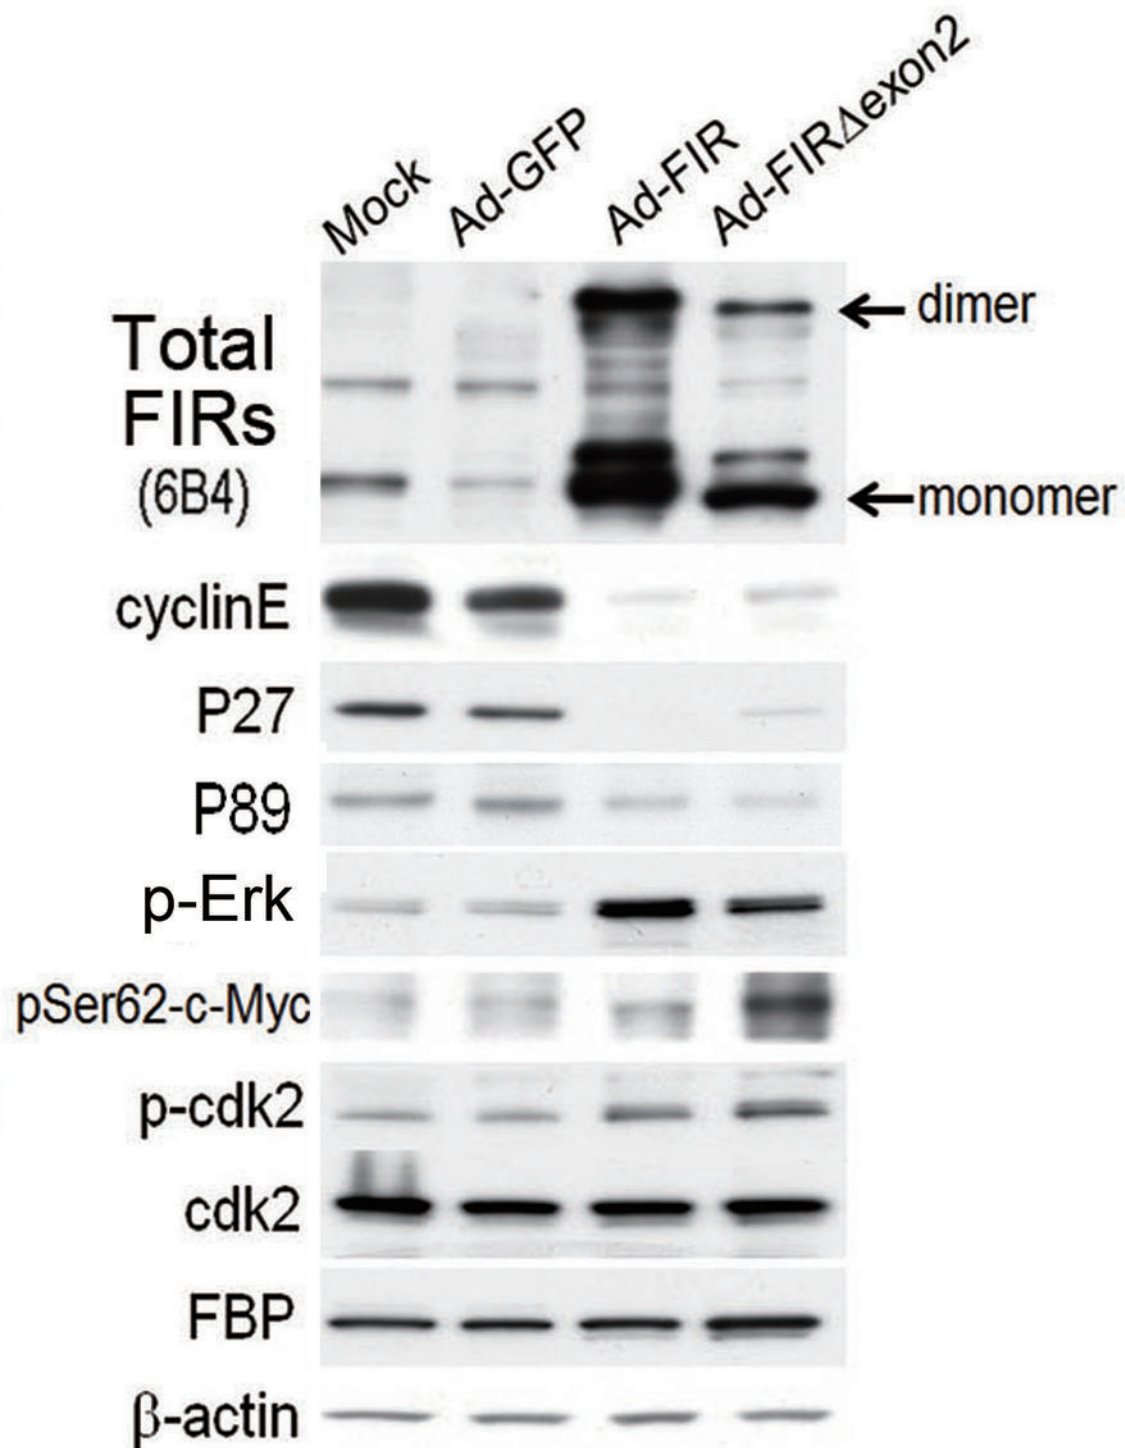

Supplement: NIHMS1630161-supplement-Supplemental_figure.pdf [file NIHMS1630161-supplement-Supplemental_figure.pdf]
